# Supplementary material
Source: PubMed Central journal article supplement (PMC4652776)
Supplement: supp_gkv789_nar-01623-f-2015-File013.pdf [file supp_gkv789_nar-01623-f-2015-File013.pdf]

## Supplementary Data

### Site specific replacements of a single loop nucleoside with a dibenzyl linker may switch the activity of TBA from anticoagulant to antiproliferative

Maria Scuotto<sup>1</sup>, Elisa Riviuccio<sup>1</sup>, Alessia Varone<sup>2</sup>, Daniela Corda<sup>2</sup>, Mariarosaria Bucci<sup>1</sup>, Valentina Vellecco<sup>1</sup>, Giuseppe Cirino<sup>1</sup>, Antonella Virgilio<sup>1</sup>, Veronica Esposito<sup>1</sup>, Aldo Galeone<sup>1</sup>, Nicola Borbone<sup>1,\*</sup>, Michela Varra<sup>1,\*</sup> and Luciano Mayol<sup>1</sup>

#### Table of contents

|                                                                                                                                 |              |
|---------------------------------------------------------------------------------------------------------------------------------|--------------|
| 1. Figure 1S. CD spectra in K <sup>+</sup> buffer.                                                                              | page S2      |
| 2. Figures 2S. CD melting profiles of TBA and TBA-bs annealed at 2.0×10 <sup>-5</sup> M [ON] in PBS and K <sup>+</sup> buffers. | pages S3-S4  |
| 3. Figures 3S. CD melting profiles of TBA-bs at different concentrations in K <sup>+</sup> buffer.                              | pages S5-S11 |
| 4. Figure 4Sa. <sup>1</sup> H NMR spectra of TBA-bs12 in PBS at 25 °C                                                           | page S12     |
| 5. Figure 4Sb. <sup>1</sup> H NMR spectra of TBA-bs13 in PBS at 25 °C                                                           | page S13     |
| 6. Figure 4Sc. <sup>1</sup> H NMR spectra of TBA-bs3 in PBS at 25 °C                                                            | page S14     |
| 7. Figure 4Sd. <sup>1</sup> H NMR spectra of TBA-bs7 in PBS at 25 °C                                                            | page S15     |
| 8. Figure 4Se. <sup>1</sup> H NMR spectra of TBA-bs8 in PBS at 25 °C                                                            | page S16     |
| 9. Table 1S. <sup>1</sup> H NMR assignments for TBA-bs12 at 10 °C                                                               | page S17     |
| 10. Table 2S. <sup>1</sup> H NMR Δδ between assignments of TBA-bs12 and TBA                                                     | page S18     |
| 11. Table 3S. <sup>1</sup> H NMR assignments for TBA-bs13 at 10 °C                                                              | page S19     |
| 12. Table 4S. <sup>1</sup> H NMR Δδ between assignments of TBA-bs13 and TBA                                                     | page S20     |
| 13. Figure 5S. Antiproliferative activity of TBA-bs on HeLa cells                                                               | Page S21     |
| 14. Table 5S. Fibrinogen clotting time values induced by TBA-bs                                                                 | page S22     |
| 15. Table 6S. PT values induced by TBA-bs                                                                                       | page S23     |
| 16. Table 7S. MTT assay raw data for TBA-bs13                                                                                   | page S24     |
| 17. Table 8S. MTT assay raw data for TBA                                                                                        | page S25     |

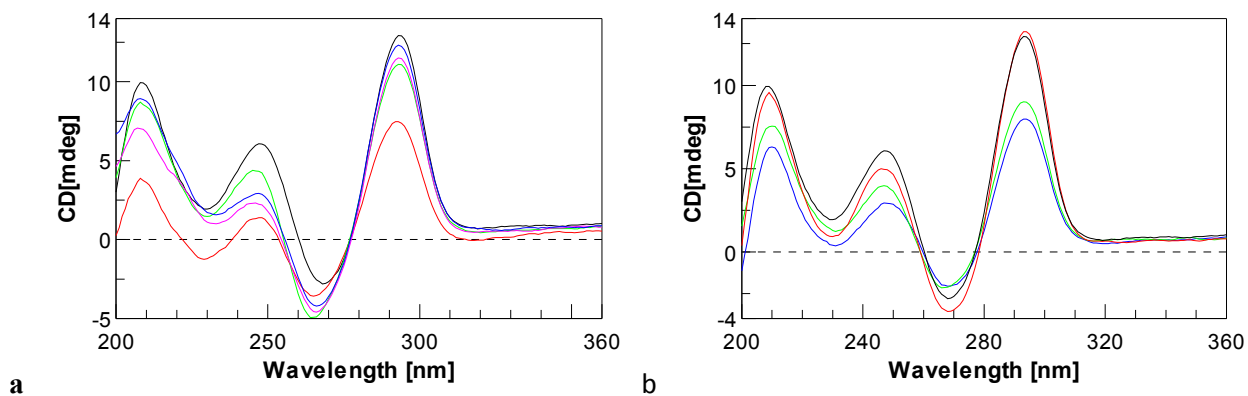

**Figure 1S.** CD profile of TBA and TBA-based sequences in  $K^+$  buffer. Spectra were collected at 10 °C, using  $[ON]$  of  $2.0 \times 10^{-5}$  M. **A.** Lines: black TBA; red TBA-bs8; green TBA-bs9; fuchsia TBA-bs4; blue TBA-bs13. **B.** Lines: black TBA; blue TBA-bs3; green TBA-bs7; red TBA-bs12.

**a**

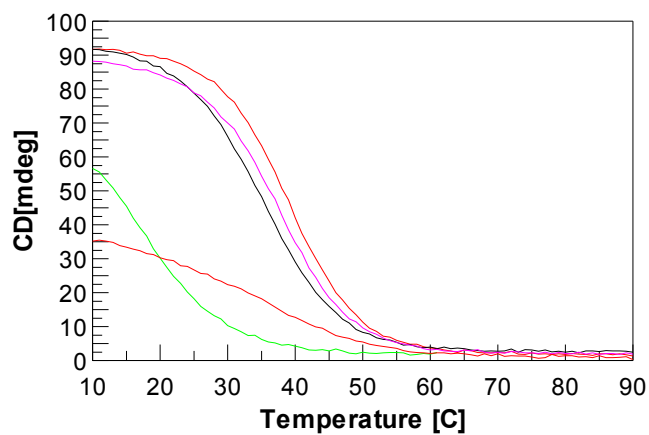

**b**

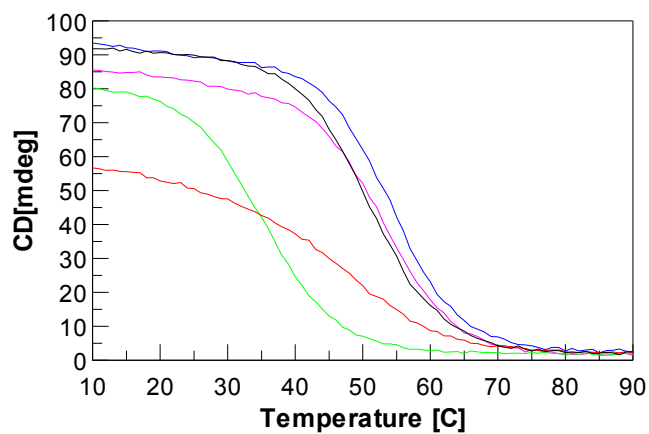

**Figure 2Sa-b.** CD melting profiles of TBA and TBA-based sequences. Fixed wavelength 295 nm. [ON] of  $2.0 \times 10^{-5}$  M. Cell length 0.5 cm. Temperature scan speed 0.5 °C/min. **a.** PBS. **b.** K<sup>+</sup> buffer. Lines: black TBA; red TBA-bs8; green TBA-bs9; fuchsia TBA-bs4; blue TBA-bs13.

**c**

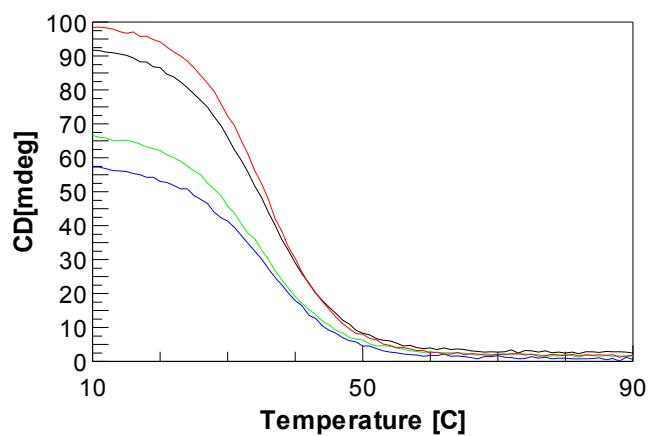

**d**

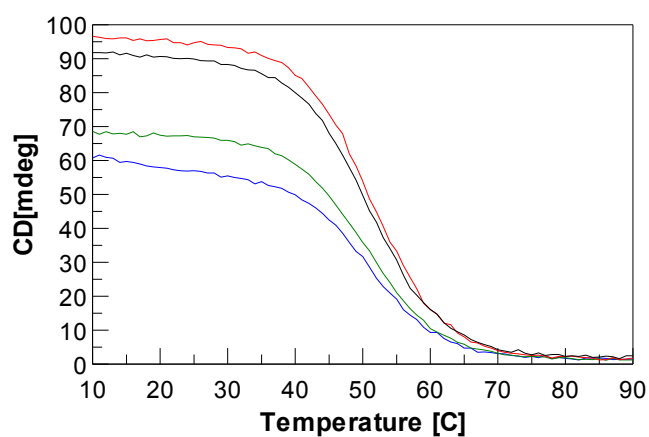

**Figures 2Sc-d.** CD melting profiles of TBA and TBA-based sequences. Fixed wavelength 295 nm. [ON] of  $2.0 \times 10^{-5}$  M. Cell length 0.5 cm, vol 1400  $\mu$ L. Temperature scan speed 0.5  $^{\circ}$ C/min. **c.** PBS. **d.** K<sup>+</sup> buffer. Lines: black TBA; blue TBA-bs3; green TBA-bs7; red TBA-bs12.

**a1**

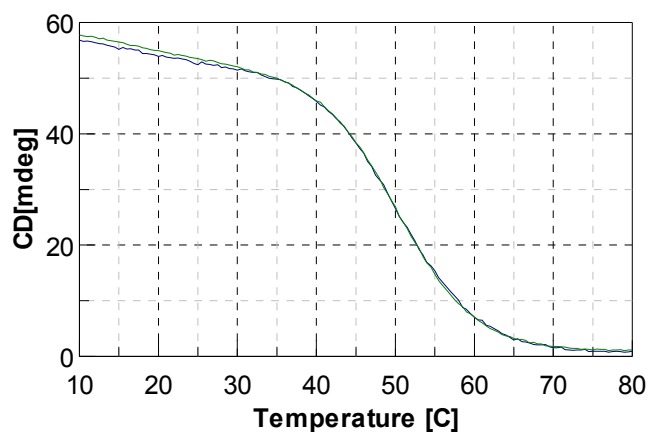

**a2**

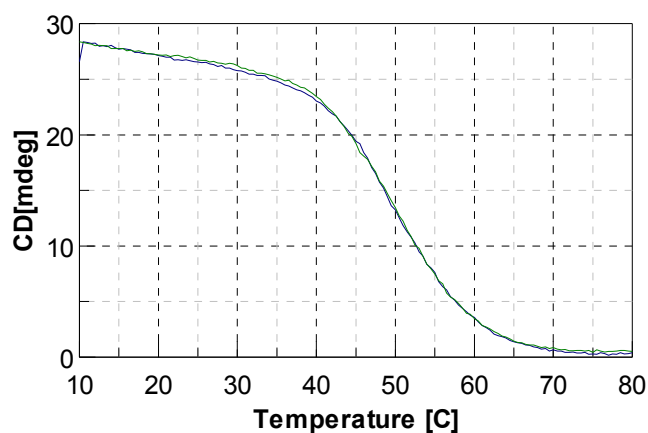

**a3**

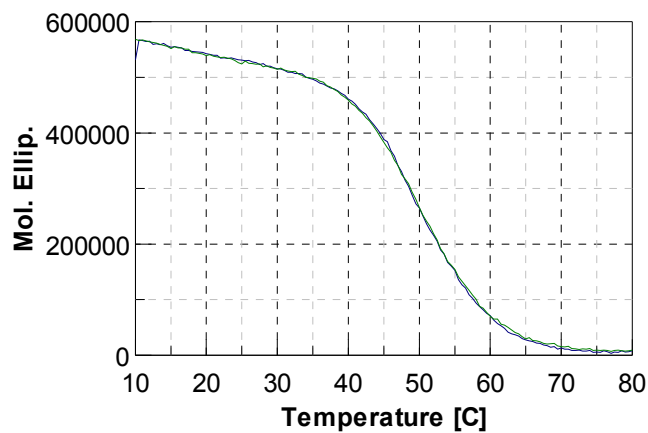

**Figure 3Sa.** **a1.** Melting-annealing curve of TBA-bs3 at  $1.0 \times 10^{-4}$  M, cell length 0.1 cm, vol 400  $\mu$ L. **a2.** Annealing-melting curve of TBA-bs3 at  $8.3 \times 10^{-6}$  M, cell length 0.5 cm, vol 1200  $\mu$ L. Fixed wavelength 295 nm, temperature scan speed 0.2  $^{\circ}$ C/min. **a3.** Superimposition of melting curves reported in **a1** and **a2** expressed as molecular ellipticity.

**b1**

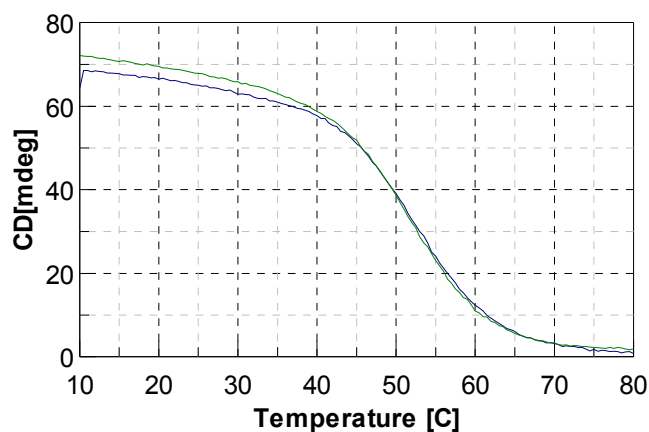

**b2**

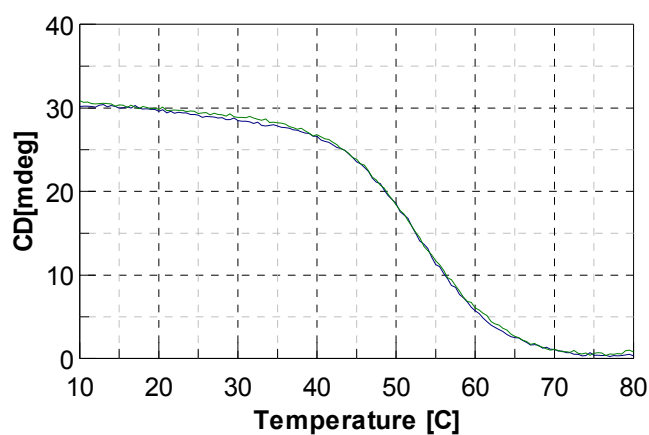

**b3**

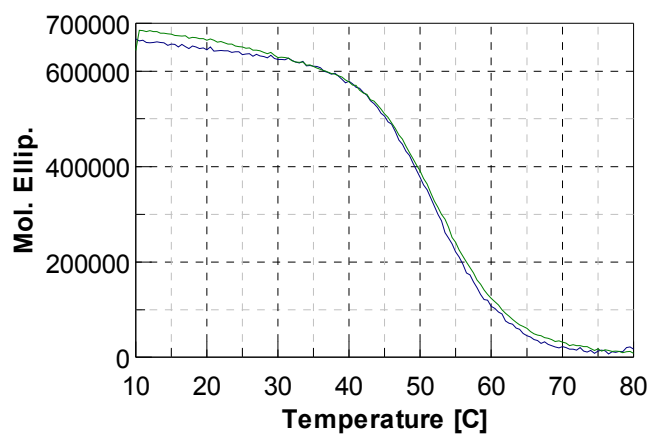

**Figure 3Sb. b1.** Melting-annealing curve of TBA-bs4 at  $1.0 \times 10^{-4}$  M, cell length 0.1 cm, vol 400  $\mu$ L. **b2.** Annealing-melting curve of TBA-bs4 at  $8.3 \times 10^{-6}$  M, cell length 0.5 cm, vol 1200  $\mu$ L. Fixed wavelength 295 nm, temperature scan speed 0.2  $^{\circ}$ C/min. **b3.** Superimposition of melting curves reported in **b1** and **b2** expressed as molecular ellipticity.

**c1**

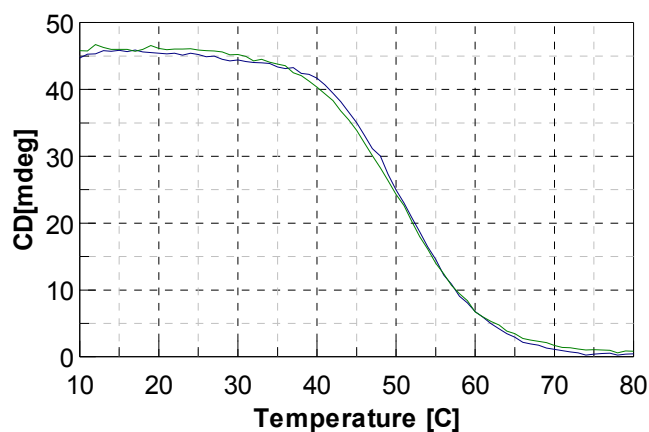

**c2**

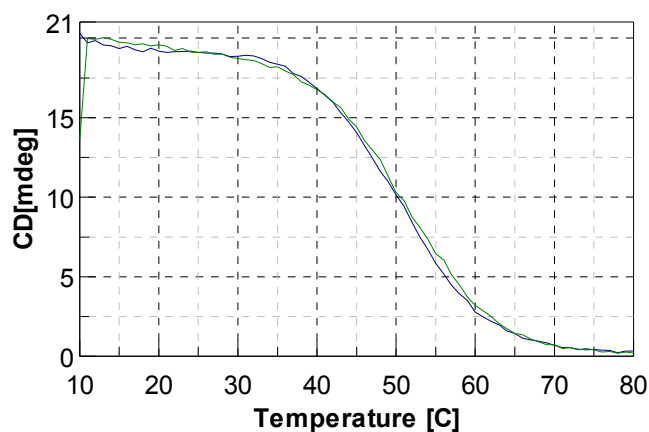

**c3**

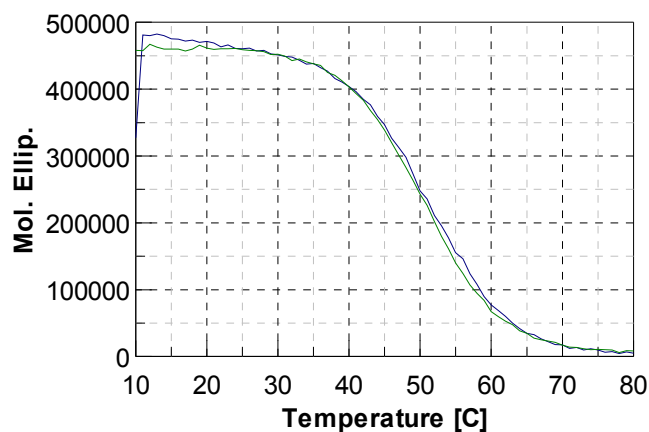

**Figure 3Sc c1.** Melting-annealing curve of TBA-bs7 at  $1.0 \times 10^{-4}$  M, cell length 0.1 cm, vol 400  $\mu$ L. **c2.** Annealing-melting curve of TBA-bs7 at  $8.3 \times 10^{-6}$  M, cell length 0.5 cm, vol 1200  $\mu$ L. Fixed wavelength 295 nm, temperature scan speed 0.2  $^{\circ}$ C/min. **c3.** Superimposition of melting curves reported in c1 and c2 expressed as molecular ellipticity.

**d1**

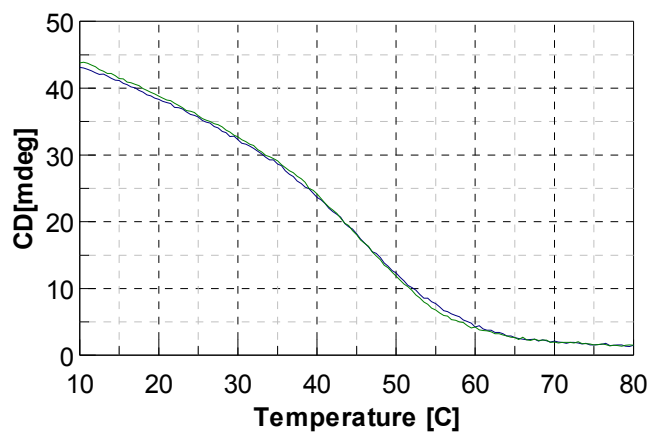

**d2**

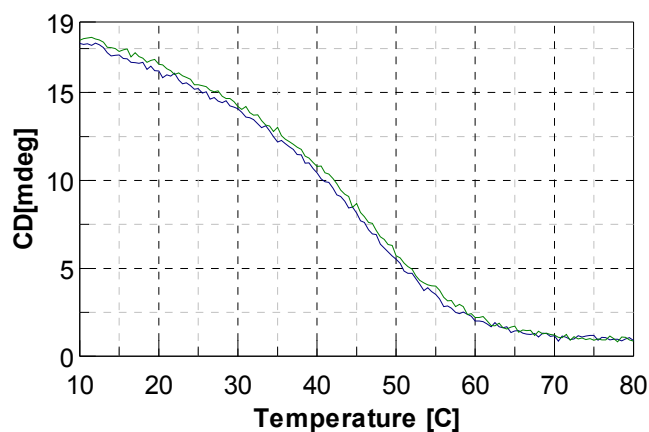

**d3**

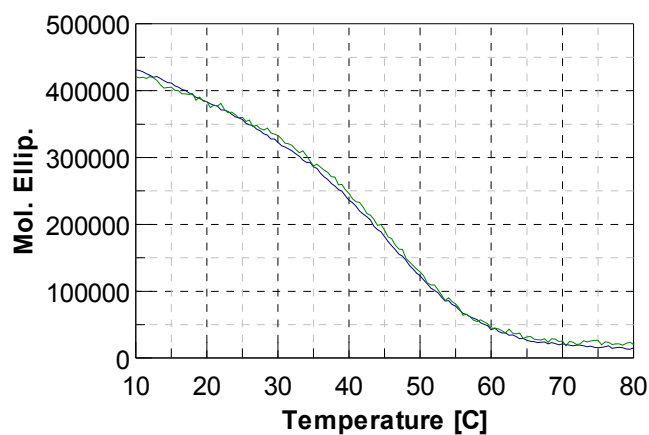

**Figure 3Sd. d1.** Melting-annealing curve of TBA-bs8 at  $1.0 \times 10^{-4}$  M, cell length 0.1 cm, vol 400  $\mu$ L. **d2.** Annealing-melting curve of TBA-bs8 at  $8.3 \times 10^{-6}$  M, cell length 0.5 cm, vol 1200  $\mu$ L. Fixed wavelength 295 nm, temperature scan speed 0.2  $^{\circ}$ C/min. **d3.** Superimposition of melting curves reported in **d1** and **d2** expressed as molecular ellipticity.



**e1**

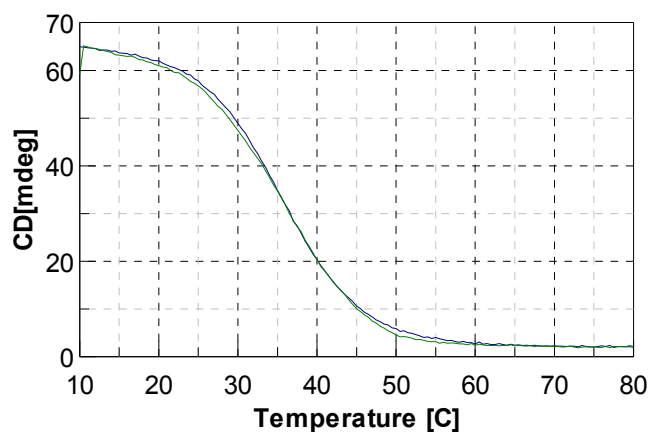

**e2**

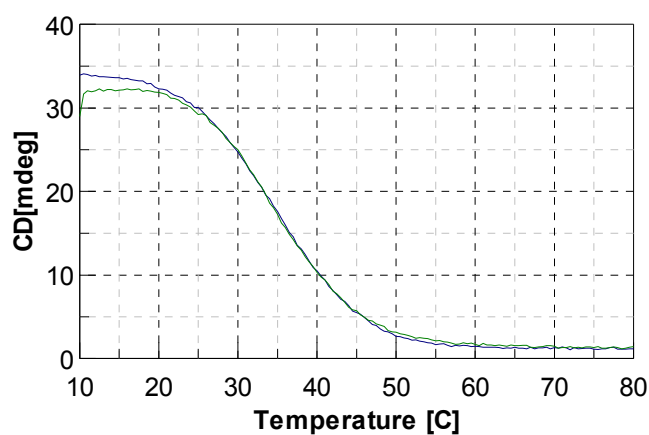

**e3**

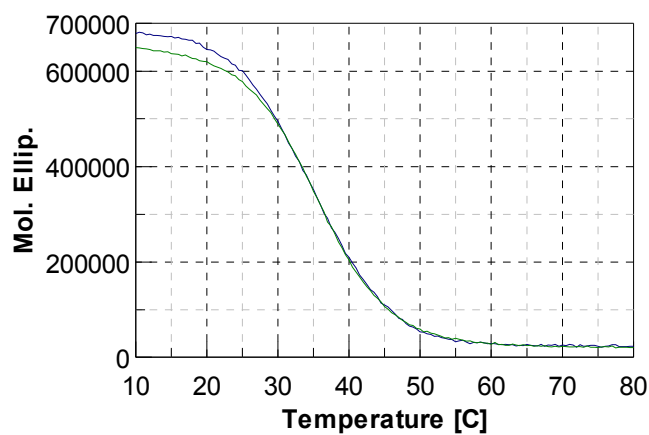

**Figure 3Se.** **e1.** Melting-annealing curve of TBA-bs9 at  $1.0 \times 10^{-4}$  M, cell length 0.1 cm, vol 400  $\mu$ L. **e2.** Annealing-melting curve of TBA-bs9 at  $8.3 \times 10^{-6}$  M, cell length 0.5 cm, vol 1200  $\mu$ L. Fixed wavelength 295 nm, temperature scan speed 0.2  $^{\circ}$ C/min. **e3.** Superimposition of melting curves reported in **e1** and **e2** expressed as molecular ellipticity.

**f1**

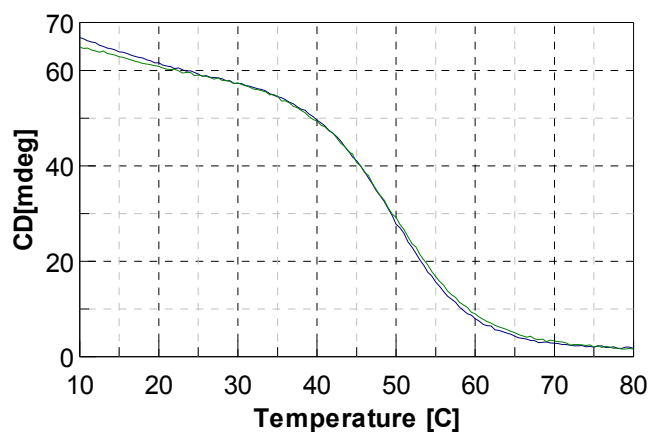

**f2**

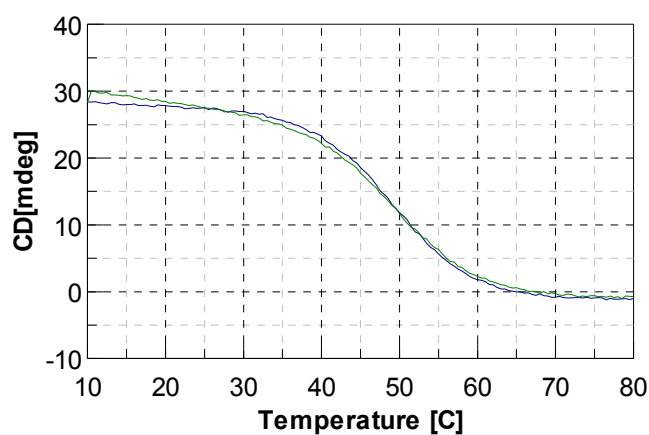

**f3**

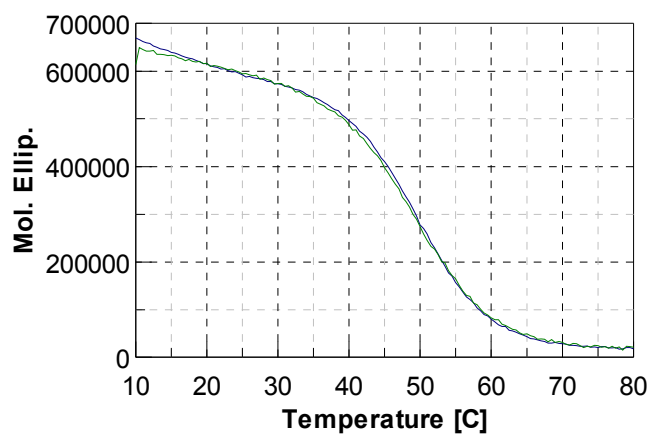

**Figure 3Sf. f1.** Melting-annealing curve of TBA-bs12 at  $1.0 \times 10^{-4}$  M, cell length 0.1 cm, vol 400  $\mu$ L. **f2.** Annealing-melting curve of TBA-bs12 at  $8.3 \times 10^{-6}$  M, cell length 0.5 cm, vol 1200  $\mu$ L. Fixed wavelength 295 nm, temperature scan speed 0.2  $^{\circ}$ C/min. **f3.** Superimposition of melting curves reported in **f1** and **f2** expressed as molecular ellipticity.

**g1**

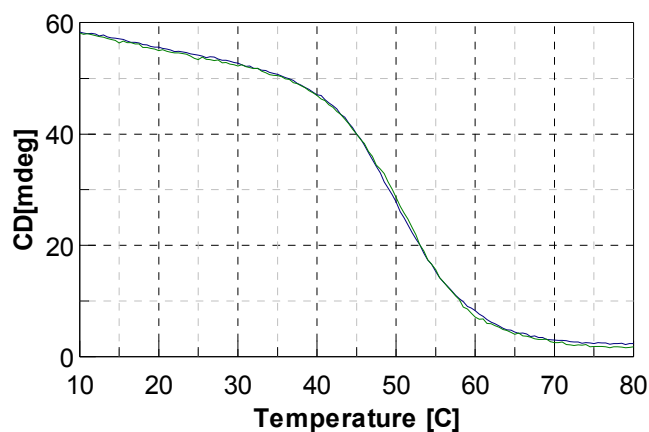

**g2**

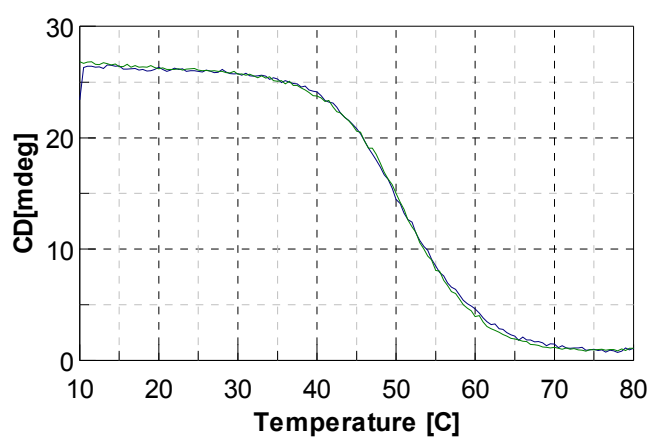

**g3**

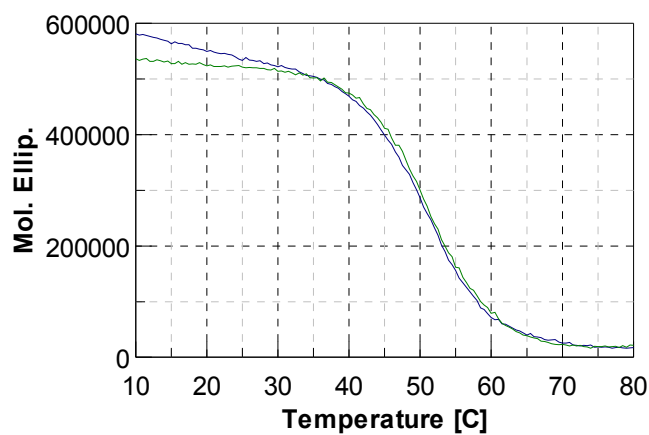

**Figure 3Sg. g1.** Melting-annealing curve of TBA-bs13 at  $1.0 \times 10^{-4}$  M, cell length 0.1 cm, vol 400  $\mu\text{L}$ . **g2.** Annealing-melting curve of TBA-bs13 at  $8.3 \times 10^{-6}$  M, cell length 0.5 cm, vol 1200  $\mu\text{L}$ . Fixed wavelength 295 nm, temperature scan speed 0.2  $^{\circ}\text{C}/\text{min}$ . **g3.** Superimposition of melting curves reported in **g1** and **g2** expressed as molecular ellipticity.

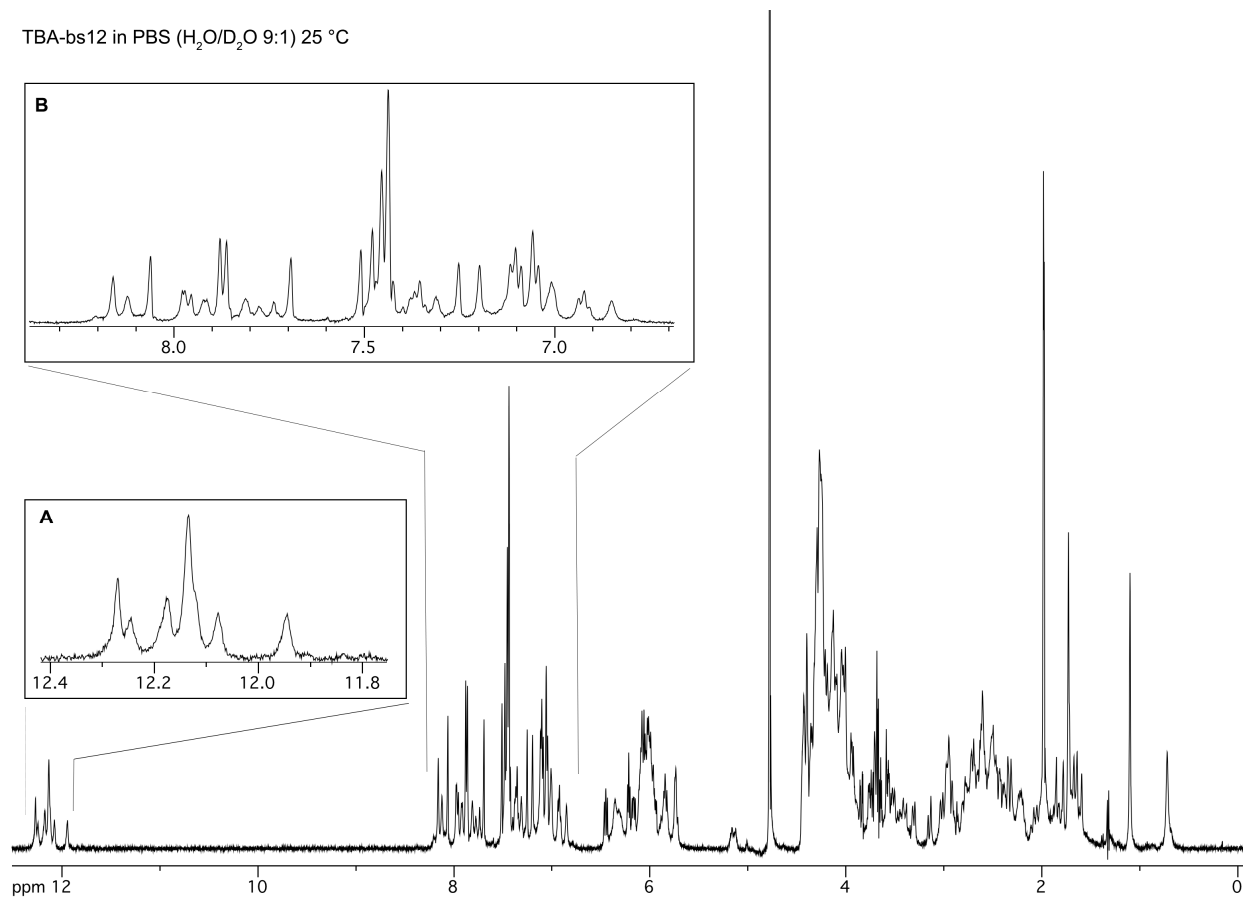

**Figure 4Sa.** <sup>1</sup>H NMR spectrum of TBA-bs12 in PBS (H<sub>2</sub>O/D<sub>2</sub>O 9:1) recorded at 25 °C. A) Expansion of the imino protons region; B) Expansion of aromatic protons region.

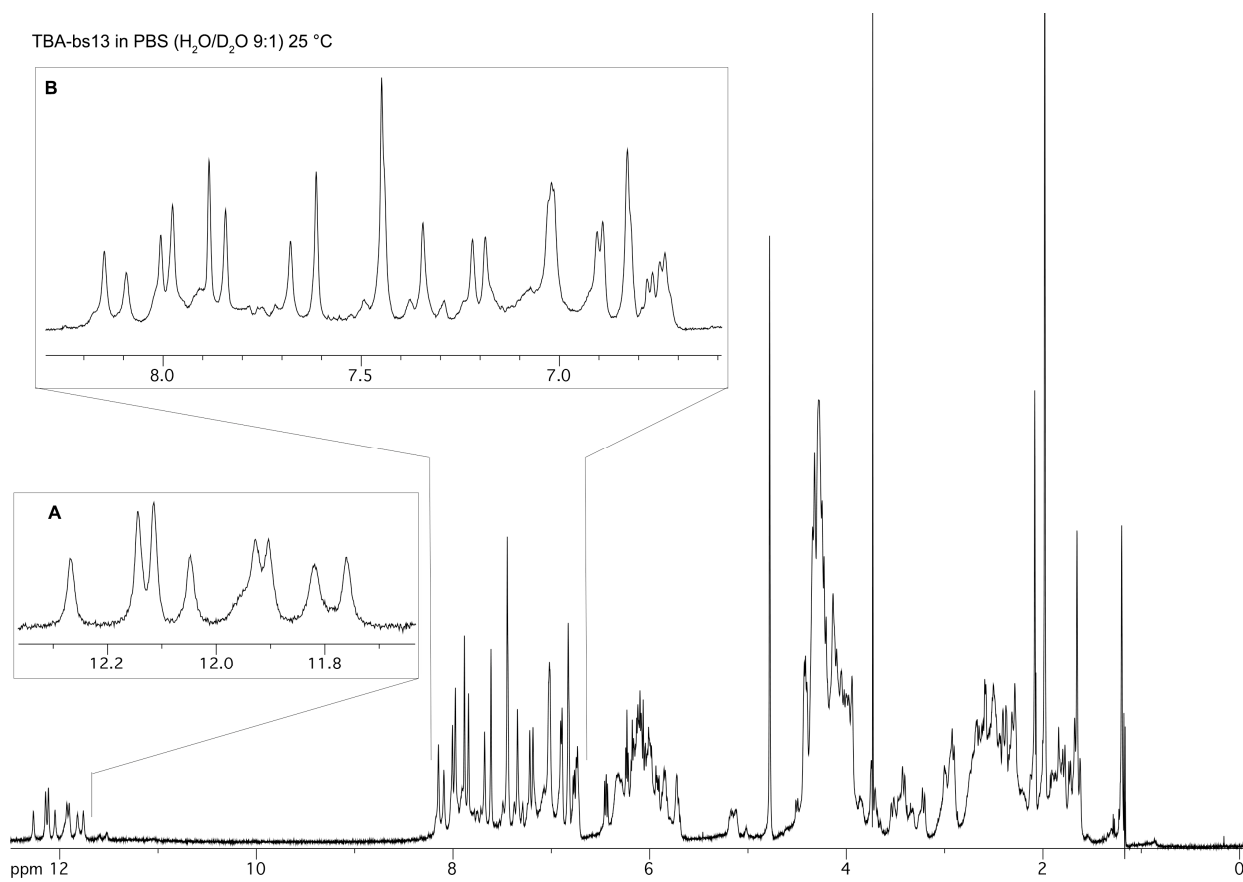

**Figure 4Sb.** <sup>1</sup>H NMR spectrum of TBA-bs13 in PBS (H<sub>2</sub>O/D<sub>2</sub>O 9:1) recorded at 25 °C. A) Expansion of the imino protons region; B) Expansion of aromatic protons region.

TBA-bs3 in PBS (H<sub>2</sub>O/D<sub>2</sub>O 9:1) 25 °C

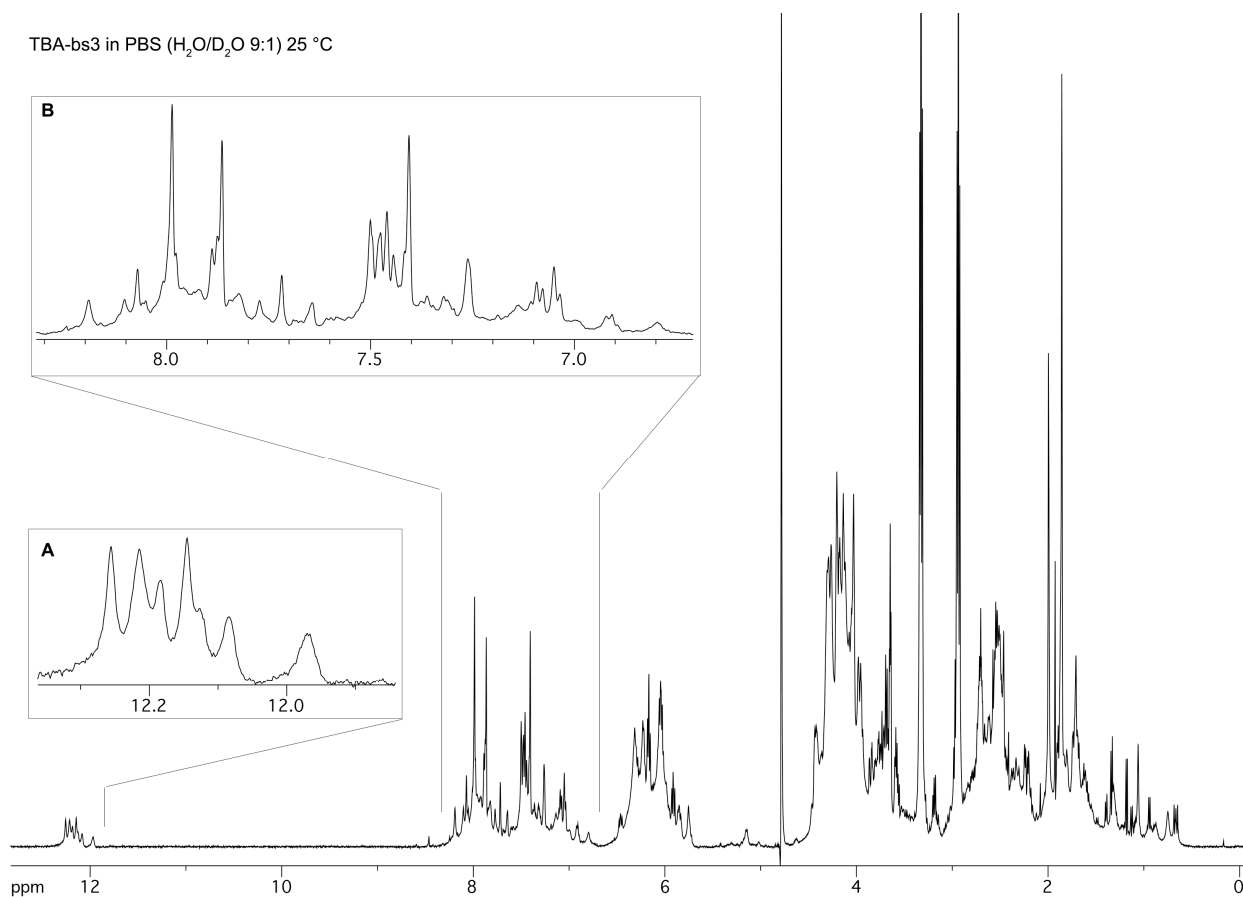

**Figure 4Sc.** <sup>1</sup>H NMR spectrum of TBA-bs3 in PBS (H<sub>2</sub>O/D<sub>2</sub>O 9:1) recorded at 25 °C. A) Expansion of the imino protons region; B) Expansion of aromatic protons region.

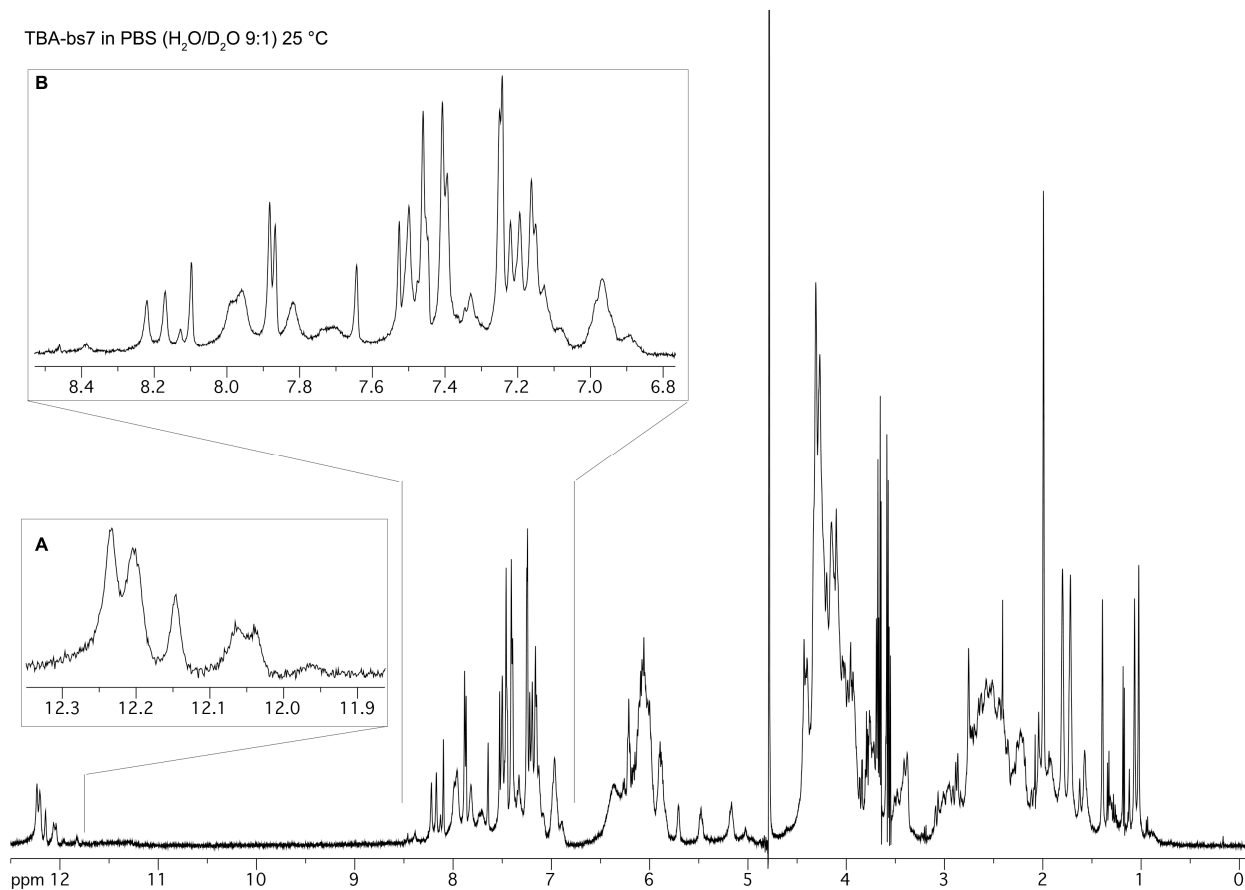

**Figure 4Sd.** <sup>1</sup>H NMR spectrum of TBA-bs7 in PBS (H<sub>2</sub>O/D<sub>2</sub>O 9:1) recorded at 25 °C. A) Expansion of the imino protons region; B) Expansion of aromatic protons region.

TBA-bs8 in PBS (H<sub>2</sub>O/D<sub>2</sub>O 9:1) 25 °C

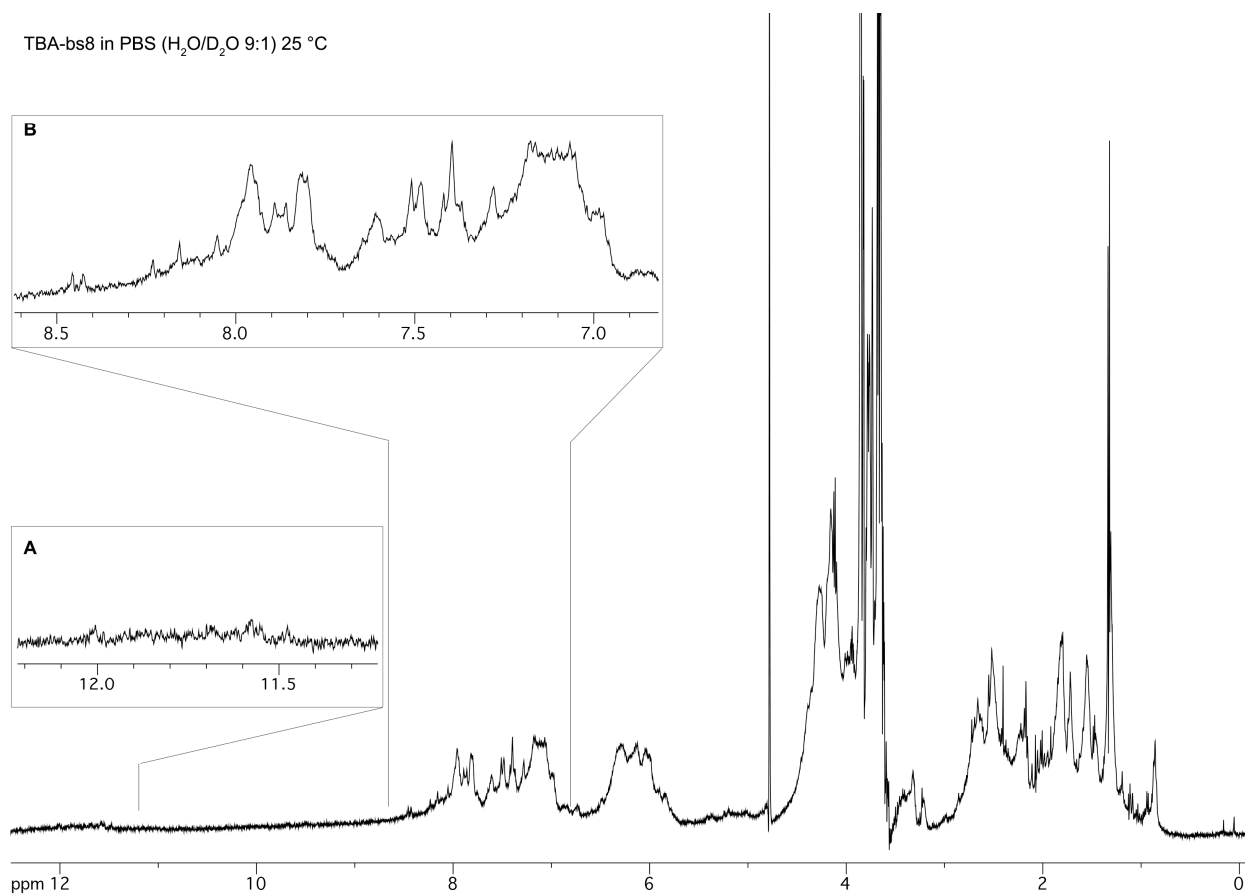

**Figure 4Se.** <sup>1</sup>H NMR spectrum of TBA-bs8 in PBS (H<sub>2</sub>O/D<sub>2</sub>O 9:1) recorded at 25 °C. A) Expansion of the imino protons region; B) Expansion of aromatic protons region.



**Table 1S.** <sup>1</sup>H NMR assignments for TBA-bs12 at 10 °C (δ in ppm).

| X12                   | a                              | b                | c                | d                 | e                | f                | g                                 | h               | i                              | l                 |                   |  |
|-----------------------|--------------------------------|------------------|------------------|-------------------|------------------|------------------|-----------------------------------|-----------------|--------------------------------|-------------------|-------------------|--|
| Nucl                  | H <sub>6</sub> /H <sub>8</sub> | H <sub>1</sub> ' | H <sub>2</sub> ' | H <sub>2</sub> '' | H <sub>3</sub> ' | H <sub>4</sub> ' | H <sub>5</sub> /H <sub>5</sub> '' | CH <sub>3</sub> | H <sub>3</sub> /H <sub>1</sub> | NH <sub>2</sub> i | NH <sub>2</sub> e |  |
| G <sub>1</sub>        | 7,42                           | 6,09             | 2,99             | 2,96              | 4,92             | 4,41             | 4,05/4,14                         | -               | 12,10                          | 9,41              |                   |  |
| G <sub>2</sub>        | 8,20                           | 6,02             | 3,04             | 2,34              | 5,16             | 4,42             | 4,23                              | -               | 12,16                          |                   |                   |  |
| T <sub>3</sub>        | 7,89                           | 6,20             | 2,24             | 2,59              | 4,91             | 4,29             |                                   | 1,98            | -                              | -                 | -                 |  |
| T <sub>4</sub>        | 7,20                           | 6,07             | 2,04             | 2,66              | 4,89             | 4,28             | 3,93                              | 1,07            | -                              | -                 | -                 |  |
| G <sub>5</sub>        | 7,45                           | 6,03             | 3,37             | 2,89              | 4,86             | 4,41             | 4,29                              | -               | 12,29                          | 9,46              | 6,79              |  |
| G <sub>6</sub>        | 7,71                           | 5,94             | 2,80             | 2,60              | 5,11             | 4,46             | 4,25                              | -               | 12,19                          | 10,19             | 6,68              |  |
| T <sub>7</sub>        | 7,92                           | 6,48             | 2,51             | 2,61              | 4,86             | 4,43             | 4,24/4,28                         | 1,97            | -                              | -                 | -                 |  |
| G <sub>8</sub>        | 7,48                           | 5,75             | 1,97             | 2,32              | 4,79             | 3,99             |                                   | -               | -                              | -                 | -                 |  |
| T <sub>9</sub>        | 7,26                           | 5,83             | 1,98             | 2,42              | 4,63             | 3,75             | 3,56/3,03                         | 1,80            | -                              | -                 | -                 |  |
| G <sub>10</sub>       | 7,42                           | 6,01             | 3,67             | 2,79              | 4,92             | 4,25             |                                   | -               | 11,92                          | 7,26              | 5,83              |  |
| G <sub>11</sub>       | 7,43                           | 6,09             | 2,97             | 1,99              | 4,91             | 4,28             |                                   | -               | 12,09                          |                   |                   |  |
| <b>X<sub>12</sub></b> | <b>6,91</b>                    | <b>7,10</b>      | <b>7,03</b>      | <b>7,35</b>       | <b>7,44</b>      | <b>7,47</b>      | <b>2,95</b>                       | <b>2,33</b>     | <b>3,28</b>                    | <b>3,17</b>       | -                 |  |
| T <sub>13</sub>       | 7,46                           | 6,07             | 2,00             | 2,73              | 4,89             | 4,30             | 3,94                              | 0,62            | -                              | -                 | -                 |  |
| G <sub>14</sub>       | 7,50                           | 6,10             | 3,52             | 2,96              | 4,92             | 4,45             | 4,37                              | -               | 12,14                          | 9,8               | 6,79              |  |
| G <sub>15</sub>       | 8,09                           | 6,16             | 2,71             | 2,45              | 4,80             | 4,27             |                                   | -               | 12,34                          | 9,41              |                   |  |

**Table 2S.**  $\Delta\delta$  in ppm between  $^1\text{H}$  NMR assignments of TBA-bs12 and TBA\* (10 °C).

| Nucl | H6/H8        | H1'   | H2'   | H2''         | H3'          | H4'          | H5'/H5''  | CH3          | H3/H1 |
|------|--------------|-------|-------|--------------|--------------|--------------|-----------|--------------|-------|
| G1   | 0,00         | 0,01  | -0,03 | 0,00         | -0,07        | 0,01         | 0,02/0,02 | -            | -0,02 |
| G2   | 0,00         | 0,01  | 0,00  | 0,00         | 0,01         | 0,01         | 0,00      | -            | 0,02  |
| T3   | -0,01        | 0,01  | 0,02  | 0,03         | 0,00         | 0,00         |           | 0,00         | -     |
| T4   | 0,02         | 0,00  | -0,02 | 0,00         | 0,01         | 0,08         | 0,01      | 0,04         | -     |
| G5   | 0,00         | -0,01 | -0,01 | -0,02        | -0,01        | 0,00         | -0,01     | -            | 0,07  |
| G6   | 0,01         | -0,01 | 0,01  | -0,01        | -0,01        | 0,01         | 0,02/0,02 | -            | 0,01  |
| T7   | -0,01        | -0,01 | 0,00  | 0,00         | 0,00         | 0,00         | 0,00/0,00 | -0,01        | -     |
| G8   | 0,01         | -0,02 | -0,01 | 0,00         | 0,02         | 0,01         |           | -            | -     |
| T9   | 0,00         | 0,01  | 0,02  | 0,01         | 0,01         | -0,01        | 0,02/0,01 | 0,01         | -     |
| G10  | -0,04        | -0,05 | -0,06 | <b>-0,14</b> | 0,00         | -0,03        |           | -            | 0,00  |
| G11  | <b>-0,80</b> | 0,07  | -0,01 | <b>-0,34</b> | <b>-0,23</b> | <b>-0,11</b> |           | -            | 0,02  |
| T13  | <b>0,21</b>  | -0,04 | -0,08 | 0,01         | -0,02        | 0,08         | 0,02      | <b>-0,36</b> | -     |
| G14  | 0,02         | 0,02  | 0,01  | 0,00         | 0,00         | 0,03         | -0,00     | -            | 0,03  |
| G15  | 0,01         | 0,00  | 0,02  | 0,01         | 0,00         | 0,02         |           | -            | 0,03  |

$\Delta\delta \geq \pm 0.10$  ppm are in bold. \*Chemical shift values for TBA were taken from ref. 41

**Table 3S.** <sup>1</sup>H NMR assignments for TBA-bs13 at 10 °C (δ in ppm).

| X13                   |                                     |                      |                      |                       |                      |                      |                                       |                      |                                     |                        |                   |
|-----------------------|-------------------------------------|----------------------|----------------------|-----------------------|----------------------|----------------------|---------------------------------------|----------------------|-------------------------------------|------------------------|-------------------|
| Nucl                  | a<br>H <sub>6</sub> /H <sub>8</sub> | b<br>H <sub>1'</sub> | c<br>H <sub>2'</sub> | d<br>H <sub>2''</sub> | e<br>H <sub>3'</sub> | f<br>H <sub>4'</sub> | g<br>H <sub>5</sub> /H <sub>5''</sub> | h<br>CH <sub>3</sub> | i<br>H <sub>3</sub> /H <sub>1</sub> | l<br>NH <sub>2</sub> i | NH <sub>2</sub> e |
| G <sub>1</sub>        | 7,43                                | 6,09                 | 3,01                 | 3,01                  | 4,99                 | 4,41                 | 4,05/4,13                             | -                    | 12,08                               |                        |                   |
| G <sub>2</sub>        | 8,18                                | 6,10                 | 3,05                 | 2,36                  | 5,16                 | 4,44                 | 4,29                                  | -                    | 12,10                               | 10,58                  |                   |
| T <sub>3</sub>        | 7,88                                | 6,22                 | 2,30                 | 2,61                  | 4,95                 | 4,31                 | 4,27                                  | 1,98                 | -                                   |                        |                   |
| T <sub>4</sub>        | 7,18                                | 6,08                 | 2,07                 | 2,67                  | 4,90                 | 4,42                 | 3,96                                  | 1,18                 | -                                   |                        |                   |
| G <sub>5</sub>        | 7,46                                | 6,05                 | 3,44                 | 2,92                  | 4,89                 | 4,28                 |                                       | -                    | 12,30                               | 9,48                   | 6,76              |
| G <sub>6</sub>        | 7,69                                | 5,91                 | 2,76                 | 2,59                  | 5,11                 | 4,45                 |                                       | -                    | 11,98                               | 9,99                   | 6,54              |
| T <sub>7</sub>        | 7,92                                | 6,47                 | 2,48                 | 2,59                  | 4,84                 | 4,43                 | 4,24/4,28                             | 1,98                 | -                                   |                        |                   |
| G <sub>8</sub>        | 7,45                                | 5,72                 | 1,98                 | 2,30                  | 4,74                 | 3,90                 | 3,98/4,06                             | -                    | -                                   |                        |                   |
| T <sub>9</sub>        | 7,22                                | 5,82                 | 1,90                 | 2,37                  | 4,60                 | 3,79                 | 2,91/3,52                             | 1,72                 | -                                   |                        |                   |
| G <sub>10</sub>       | 7,33                                | 6,01                 | 3,71                 | 2,93                  | 4,90                 |                      | 4,13                                  | -                    | 11,78                               |                        |                   |
| G <sub>11</sub>       | 8,14                                | 5,84                 | 2,95                 | 2,52                  | 5,13                 | 4,36                 |                                       | -                    | 11,88                               |                        |                   |
| T <sub>12</sub>       | 8,01                                | 6,16                 | 2,11                 | 2,30                  | 4,87                 | 4,33                 | 4,51/4,71                             | 2,09                 | -                                   |                        |                   |
| <b>X<sub>13</sub></b> | <b>6,75</b>                         | <b>6,70</b>          | <b>6,90</b>          | <b>6,81</b>           | <b>6,81</b>          | <b>7,02</b>          | <b>1,85/2,40</b>                      | <b>1,73/2,29</b>     | <b>3,19/3,85</b>                    | <b>3,42/3,95</b>       |                   |
| G <sub>14</sub>       | 7,62                                | 6,13                 | 3,40                 | 2,93                  | 4,91                 | 4,71                 | 4,32/4,51                             | -                    | 11,78                               | 9,77                   |                   |
| G <sub>15</sub>       | 8,04                                | 6,13                 | 2,68                 | 2,42                  | 4,81                 | 4,28                 | 4,13/4,21                             | -                    | 12,20                               |                        |                   |

**Table 4S.**  $\Delta\delta$  in ppm between  $^1\text{H}$  NMR assignments of TBA-bs13 and TBA\* (10 °C).

| Nucl            | H <sub>6</sub> /H <sub>8</sub> | H <sub>1</sub> ' | H <sub>2</sub> ' | H <sub>2</sub> '' | H <sub>3</sub> ' | H <sub>4</sub> ' | H <sub>5</sub> /H <sub>5</sub> '' | CH <sub>3</sub> | H <sub>3</sub> /H <sub>1</sub> |
|-----------------|--------------------------------|------------------|------------------|-------------------|------------------|------------------|-----------------------------------|-----------------|--------------------------------|
| G <sub>1</sub>  | 0,01                           | 0,01             | 0,05             | 0,05              | 0,00             | 0,01             | 0,02-0,01                         | -               | 0,00                           |
| G <sub>2</sub>  | -0,02                          | 0,07             | 0,01             | 0,02              | 0,01             | 0,03             | 0,06                              | -               | -0,04                          |
| T <sub>3</sub>  | -0,02                          | -0,03            | 0,08             | 0,05              | 0,04             | 0,02             | 0,03                              | 0,00            | -                              |
| T <sub>4</sub>  | 0,00                           | 0,01             | 0,01             | 0,01              | 0,02             | 0,22             | 0,04                              | <b>0,15</b>     | -                              |
| G <sub>5</sub>  | 0,01                           | 0,01             | 0,06             | 0,01              | 0,02             | -0,13            |                                   | -               | 0,08                           |
| G <sub>6</sub>  | -0,01                          | -0,04            | -0,03            | -0,02             | -0,01            | 0,00             |                                   | -               | <b>-0,20</b>                   |
| T <sub>7</sub>  | -0,01                          | 0,02             | -0,03            | -0,02             | -0,02            | 0,00             | 0,00-0,00                         | 0,00            | -                              |
| G <sub>8</sub>  | -0,02                          | -0,05            | 0,00             | -0,02             | -0,03            | -0,08            | -0,03/-0,04                       | -               | -                              |
| T <sub>9</sub>  | -0,04                          | 0,00             | -0,06            | -0,04             | -0,02            | 0,03             | <b>-0,10</b> /-0,03               | -0,07           | -                              |
| G <sub>10</sub> | <b>-0,13</b>                   | -0,05            | -0,01            | 0,00              | -0,02            |                  | -0,01                             | -               | <b>-0,14</b>                   |
| G <sub>11</sub> | -0,09                          | <b>-0,18</b>     | -0,03            | <b>0,19</b>       | -0,01            | -0,03            |                                   | -               | <b>-0,19</b>                   |
| T <sub>12</sub> | <b>0,11</b>                    | -0,03            | -0,09            | <b>-0,28</b>      | -0,04            | 0,04             | <b>0,27/0,39</b>                  | <b>0,11</b>     |                                |
| G <sub>14</sub> | <b>0,14</b>                    | 0,05             | <b>-0,11</b>     | -0,03             | -0,01            | <b>0,29</b>      | 0,02/ <b>0,14</b>                 | -               | <b>-0,39</b>                   |
| G <sub>15</sub> | -0,04                          | -0,03            | -0,01            | -0,02             | 0,01             | 0,03             | 0,01/0,03                         | -               | <b>-0,11</b>                   |

$\Delta\delta \geq \pm 0.10$  ppm are in bold. \*Chemical shift values for TBA were taken from ref. 41

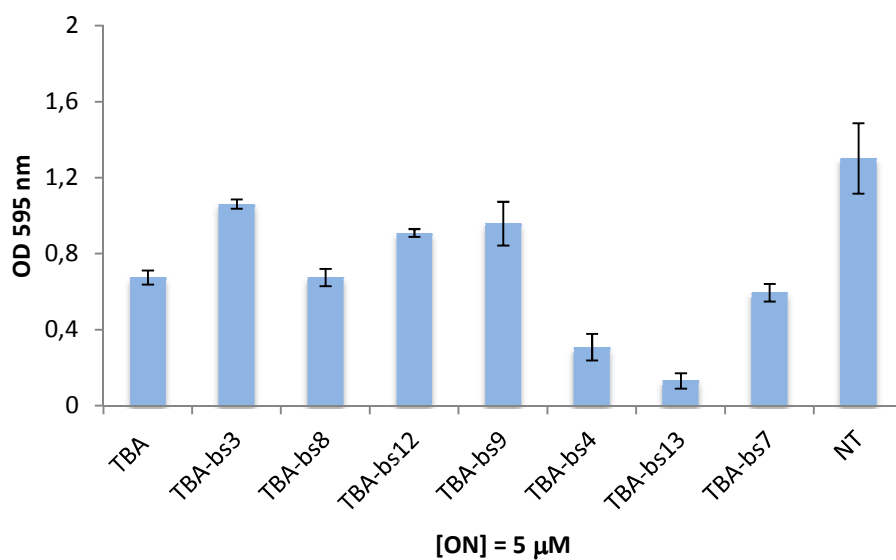

**Figure 5S.** Antiproliferative activity on HeLa cervical carcinoma. Cells were treated with 5 μM oligonucleotide, annealed in K<sup>+</sup> buffer (see experimental section). Cell viability was assayed 7 days after addition of oligonucleotide using the MTT assay. A pool of three different set of experiments (each repeated three times) were performed and the data expressed as the mean ± standard deviation.

. **Table 5S.** Fibrinogen clotting time calculated from UV scattering curves.

| <b>[ON]</b> | <b>20 nM</b> | <b>40nM</b> | <b>100 nM</b> |
|-------------|--------------|-------------|---------------|
| TBA-bs3     | 72,5±0,5     | 130,5±23,5  | 359,0±10      |
| TBA-bs4     | 29,0±0,5     | 29,0±1      | 30,5±1,5      |
| TBA-bs7     | 102,0±1      | 219,0±15    | 424,5±6,5     |
| TBA-bs8     | 55,0±1       | 71,5±14,5   | 107,0±4       |
| TBA-bs9     | 80,5±2       | 110,5±22,5  | 194,0±4       |
| TBA-bs12    | 218,0±20     | 337,0±30,5  | 651,3±49      |
| TBA-bs13    | 29,8±1       | 25,5±3      | 26,6±2        |
| TBA         | 134,5±10,5   | 227,3±4,0   | 427,5±25      |
| CONTROL     | 26,8±1,0     | 25,9±0,9    | 24,0±0,8      |
| VEHICLE     | 25,8±1,0     | 24,2±1,0    | 23,7±2,0      |

The curves were obtained measuring, as a function of the time, the UV scattering caused by fibrin polymerization. 1.0 mL of fibrinogen (2 mg/1 mL) in PBS solution was incubated for 1 min with 10 µL of each ON, to reach the final concentration reported in the table, and clot formation was triggered by addition of 1.0 NIH of human thrombin. The basal curves were registered starting the polymerization reaction in absence of any inhibitor. The effect of dilution was valued registering the polymerization reaction after the addition of PBS alone (10 µL). Wavelength was fixed at 380 nm. Each value was determinate in triplicate, and the average values and the standard errors were reported.

**Table 6S.** PT values (s) measured for TBA and its analogues at 2  $\mu$ M. PT (s) of control and vehicle (PBS) are  $13.3 \pm 0.24$  s and  $13.2 \pm 0.22$  s respectively.

| ODN             | PT (20 $\mu$ M)                   | PT (2 $\mu$ M)                    |
|-----------------|-----------------------------------|-----------------------------------|
| <b>TBA</b>      | <b>49.8 <math>\pm</math> 1.28</b> | <b>23.1 <math>\pm</math> 0.80</b> |
| <b>TBA-bs3</b>  | 43.6 $\pm$ 2.15                   | 22.7 $\pm$ 1.00                   |
| <b>TBA-bs4</b>  | 14.1 $\pm$ 0.25                   | <sup>a</sup> n.t.                 |
| <b>TBA-bs7</b>  | 56.3 $\pm$ 0.97                   | 24.2 $\pm$ 0.65                   |
| <b>TBA-bs8</b>  | 25.8 $\pm$ 0.30                   | <sup>a</sup> n.t.                 |
| <b>TBA-bs9</b>  | 24.8 $\pm$ 0.80                   | <sup>a</sup> n.t.                 |
| <b>TBA-bs12</b> | 52.0 $\pm$ 1.73                   | 24.9 $\pm$ 2.40                   |
| <b>TBA-bs13</b> | 12.5 $\pm$ 0.55                   | <sup>a</sup> n.t.                 |

**Table 7S.** Data of absorbance at 595 nm measured in concentration-dependent response MTT assay for TBA-bs13.

| <b>[TBA-bs13] <math>\mu</math>M</b> | <b>n1</b> | <b>n2</b> | <b>n3</b> | <b>average</b> | <b>w/o</b> | <b>Standard deviation</b> |
|-------------------------------------|-----------|-----------|-----------|----------------|------------|---------------------------|
| 50                                  | 0.165     | 0.157     | 0.167     | 0.163          | 0.09833333 | 0.0052915                 |
| 10                                  | 0.161     | 0.156     | 0.161     | 0.15933333     | 0.09466667 | 0.00288675                |
| 5                                   | 0.869     | 0.997     | 0.798     | 0.888          | 0.82333333 | 0.10085138                |
| 1                                   | 0.988     | 1.299     | 1.001     | 1.096          | 1.03133333 | 0.17592328                |
| 0.5                                 | 0.919     | 0.968     | 0.793     | 0.89333333     | 0.82866667 | 0.0902792                 |
| 0.1                                 | 1.145     | 1.082     | 1.025     | 1.084          | 1.01933333 | 0.06002499                |
| 0.01                                | 1.887     | 1.711     | 1.693     | 1.76366667     | 1.699      | 0.10718831                |
| 0.001                               | 1.637     | 1.81      | 1.753     | 1.73333333     | 1.66866667 | 0.08816084                |
| NT                                  | 1.158     | 1.511     | 1.433     | 1.36733333     | 1.30266667 | 0.18543552                |
| bottom                              | 0.059     | 0.066     | 0.069     | 0.06466667     | 0          | 0.0051316                 |



**Table 8S.** Data of absorbance at 595 nm measured in concentration-dependent response MTT assay for TBA.

| <b>[TBA] <math>\mu\text{M}</math></b> | <b>n1</b> | <b>n2</b> | <b>n3</b> | <b>average</b> | <b>w/o</b> | <b>standard deviation</b> |
|---------------------------------------|-----------|-----------|-----------|----------------|------------|---------------------------|
| 50                                    | 0.161     | 0.303     | 0.208     | 0.224          | 0.15933333 | 0.07233948                |
| 10                                    | 0.73      | 0.633     | 0.831     | 0.73133333     | 0.66666667 | 0.09900673                |
| 5                                     | 0.801     | 0.768     | 0.822     | 0.797          | 0.73233333 | 0.02722132                |
| 1                                     | 1.495     | 1.281     | 1.321     | 1.36566667     | 1.301      | 0.11377756                |
| 0.5                                   | 1.284     | 1.297     | 1.453     | 1.34466667     | 1.28       | 0.09404432                |
| 0.1                                   | 1.717     | 1.647     | 1.736     | 1.7            | 1.63533333 | 0.04687217                |
| 0.01                                  | 1.622     | 1.681     | 1.89      | 1.731          | 1.66633333 | 0.14082258                |
| 0.001                                 | 1.778     | 1.729     | 1.74      | 1.749          | 1.68433333 | 0.02570992                |
| NT                                    | 1.158     | 1.511     | 1.433     | 1.36733333     | 1.30266667 | 0.18543552                |
| bottom                                | 0.059     | 0.066     | 0.069     | 0.06466667     | 0          | 0.0051316                 |
